# Supplementary material
Source: publisher site journal article supplement (https://www.dovepress.com/article/348842)
Supplement: Supplementary file 1 [file get_supplementary_file.php]

**Supplementary material**

**Supplementary Table S1:** Factor correlation matrix of the Chinese version of Central Sensitization Inventory

| **Factor** | **F1** | **F2** | **F3** | **F4** | **F5** |
| --- | --- | --- | --- | --- | --- |
| **F1** | - | 0.551 | 0.499 | 0.514 | 0.257 |
| **F2** | 0.551 | - | 0.589 | 0.501 | 0.316 |
| **F3** | 0.499 | 0.589 | - | 0.530 | 0.450 |
| **F4** | 0.514 | 0.501 | 0.530 | - | 0.313 |
| **F5** | 0.257 | 0.316 | 0.450 | 0.313 | - |
